# Supplementary material for: Efficient solar light-driven H2 production: post-synthetic encapsulation of a Cu2O co-catalyst in a metal–organic framework (MOF) for boosting the effective charge carrier separation
Source: Royal Society of Chemistry journal article supplement (doi:10.1039/c8cy00604k), 2018-01-01
Supplement: c8cy00604k1.pdf [file c8cy00604k1.pdf]

## Electronic Supplementary Information (ESI)

### Efficient solar light driven H<sub>2</sub> production: A post-synthetic encapsulation of Cu<sub>2</sub>O co-catalyst on metal-organic framework (MOF) for boosting the effective charge-carrier separation

Peramaiah Karthik,<sup>a</sup> Ekambaram Balaraman,<sup>b\*</sup> and Bernaurdshaw Neppolian<sup>a\*</sup>

<sup>a</sup>SRM Research Institute and Department of Chemistry, SRM University, Kattankulathur,  
Chennai- 603203, Tamil Nadu, India.

<sup>b</sup>Organic Chemistry Division, CSIR-National Chemical Laboratory (CSIR-NCL), Dr. Homi  
Bhabha Road, Pune-411008, India.

\*E-mail: *neppolain.b@res.srm.univ.ac.in*, *eb.raman@ncl.res.in*

## Content

1. Figure S1.TEM-EDX of  $\text{Cu}_2\text{O}/\text{NH}_2\text{-MIL-125(Ti)}$  MOF.
2. Figure S2.X-ray diffraction patterns of  $\text{NH}_2\text{-MIL-125(Ti)}$  and  $\text{Cu}_2\text{O}/\text{NH}_2\text{-MIL-125(Ti)}$  MOFs.
3. Figure S3. X-ray diffraction patterns of  $\text{Cu}_2\text{O}$ .
4. Figure S4.  $\text{N}_2$  adsorption and desorption isotherms of  $\text{NH}_2\text{-MIL-125(Ti)}$  and  $\text{Cu}_2\text{O}/\text{NH}_2\text{-MIL-125(Ti)}$  MOF.
5. Figure S5.FT-IR spectra of  $\text{NH}_2\text{-MIL-125(Ti)}$  and  $\text{Cu}_2\text{O}/\text{NH}_2\text{-MIL-125(Ti)}$  MOFs.
6. Figure S6. Survey scan and  $\text{Cu}2\text{p}$  spectra of  $\text{Cu}_2\text{O}/\text{NH}_2\text{-MIL-125(Ti)}$  MOFs.
7. Figure S7.Photographs of pristine  $\text{NH}_2\text{-MIL-125(Ti)}$  MOF and (b)  $\text{Cu}_2\text{O}/\text{NH}_2\text{-MIL-125(Ti)}$  MOF.
8. Figure S8.FT-IR spectra of after the photocatalytic  $\text{H}_2$  production.
9. Figure S9.TEM image after the photocatalytic  $\text{H}_2$  production.
10. Figure S10.TEM-EDX of  $\text{Cu}_2\text{O}/\text{NH}_2\text{-MIL-125(Ti)}$  MOF after the photocatalytic reaction.
11. Figure S11.Photocatalytic  $\text{H}_2$  production using physical mixture of  $\text{Cu}_2\text{O}$  and  $\text{NH}_2\text{-MIL-125 (Ti)}$  MOF.
12. Figure S12.Raman analysis of  $\text{NH}_2\text{-MIL-125(Ti)}$  and  $\text{Cu}_2\text{O}/\text{NH}_2\text{-MIL-125(Ti)}$  MOFs.
13. Table S1.Elemental composition of  $\text{Cu}_2\text{O}/\text{NH}_2\text{-MIL-125(Ti)}$  MOF.

14. Table S2. The BET surface area and pore volume data of pristine NH<sub>2</sub>-MIL-125(Ti) and Cu<sub>2</sub>O/ NH<sub>2</sub>-MIL-125(Ti) MOF.
15. Table S3. Photocatalytic H<sub>2</sub> production comparison with existing MOF based catalysts.
16. Table S4. Elemental composition of Cu<sub>2</sub>O/ NH<sub>2</sub>-MIL-125(Ti) MOF after the photocatalytic H<sub>2</sub> production.
17. Apparent Quantum Yield (AQY).

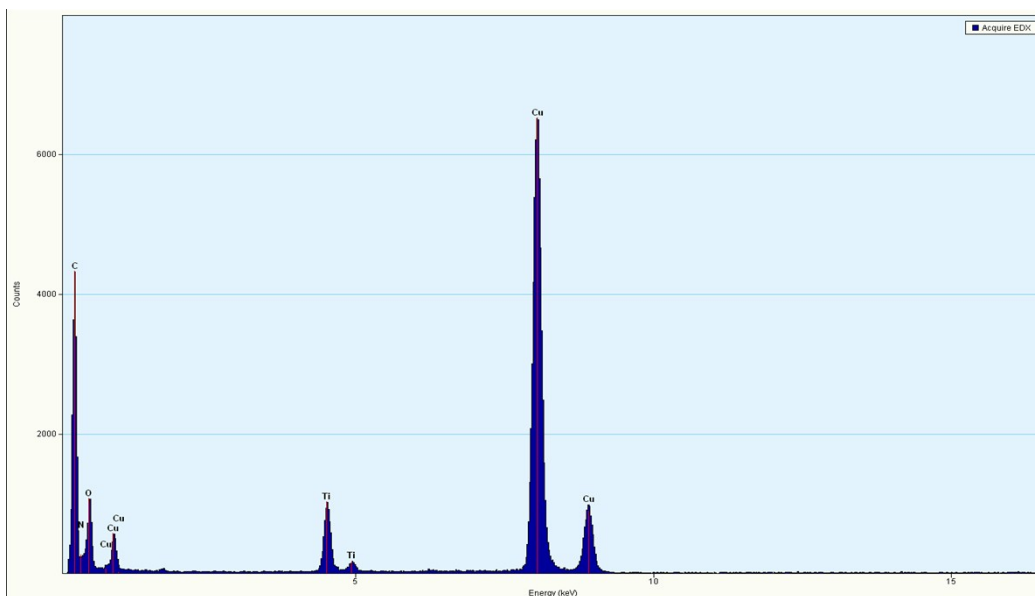

**Figure S1.** TEM-EDX of  $\text{Cu}_2\text{O}/\text{NH}_2\text{-MIL-125(Ti)}$  MOF.

The EDX analysis shows the presence of all the elements such as C, N, O, Ti and Cu in the synthesized Metal-organic framework photocatalyst. The atomic and weight % of elements are tabulated in table S1.

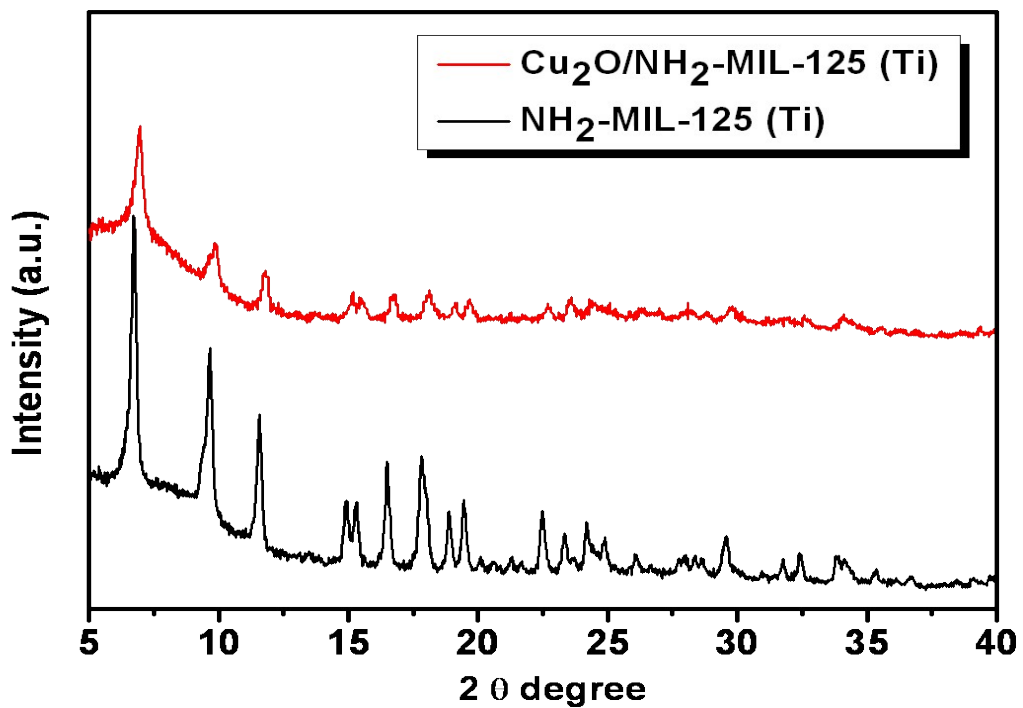

Figure S2. X-ray diffraction patterns of  $\text{NH}_2\text{-MIL-125(Ti)}$  and  $\text{Cu}_2\text{O}/\text{NH}_2\text{-MIL-125(Ti)}$  MOFs.

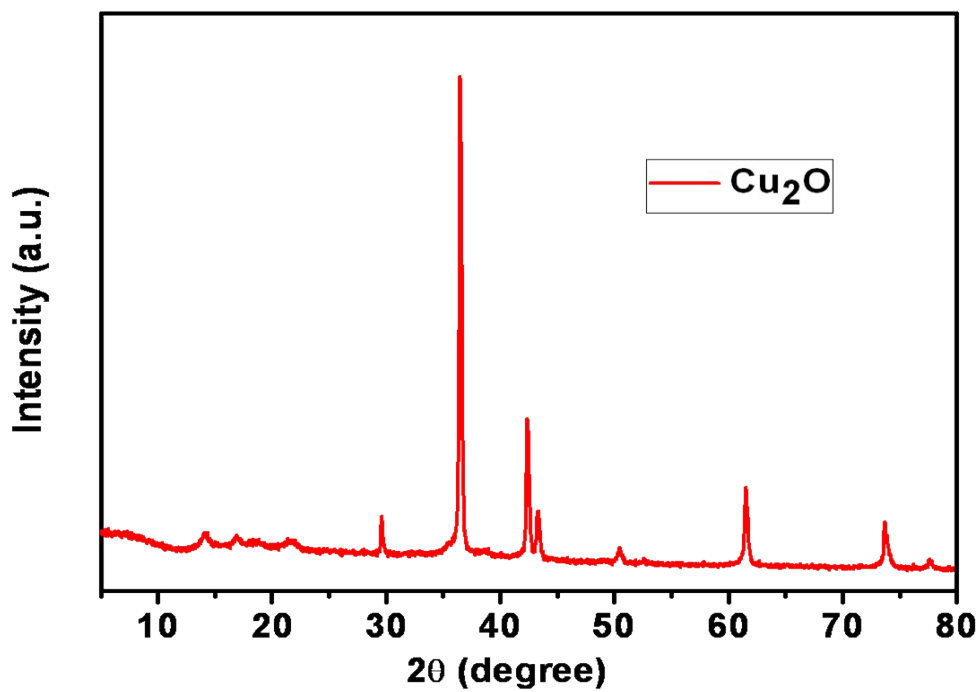

Figure S3. X-ray diffraction patterns of  $\text{Cu}_2\text{O}$ .

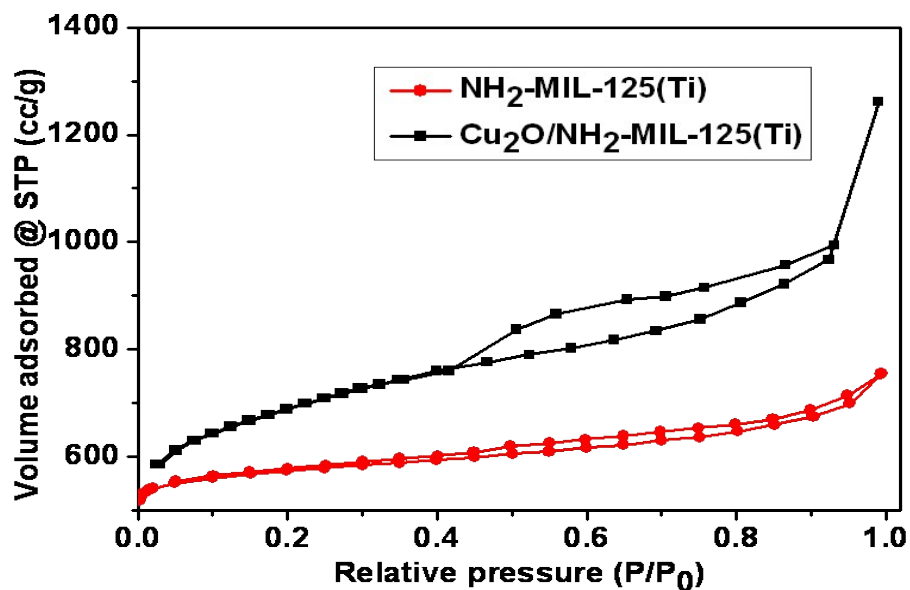

**Figure S4.** N<sub>2</sub> adsorption and desorption isotherms of NH<sub>2</sub>-MIL-125(Ti) and Cu<sub>2</sub>O/ NH<sub>2</sub>-MIL-125(Ti) MOF.

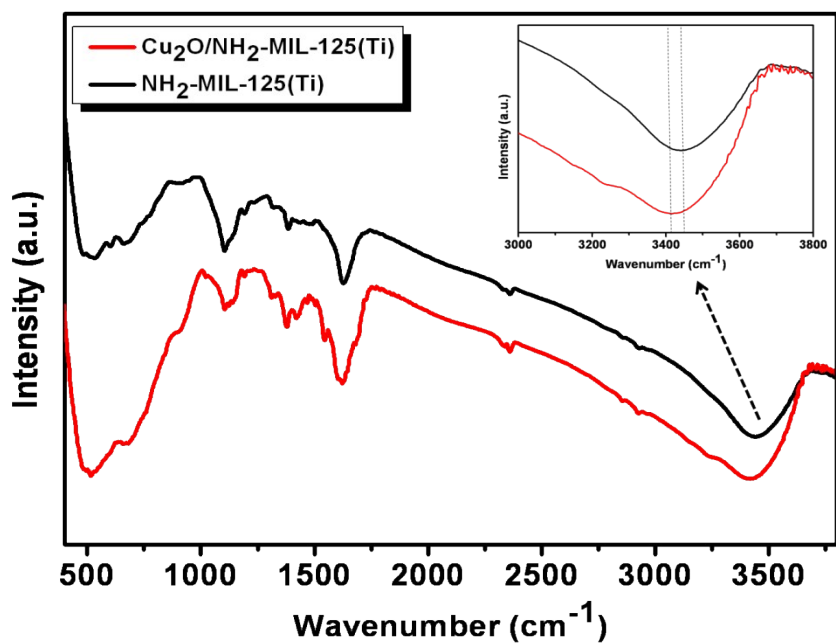

**Figure S5.** FT-IR spectra of NH<sub>2</sub>-MIL-125(Ti) and Cu<sub>2</sub>O/ NH<sub>2</sub>-MIL-125(Ti) MOFs.

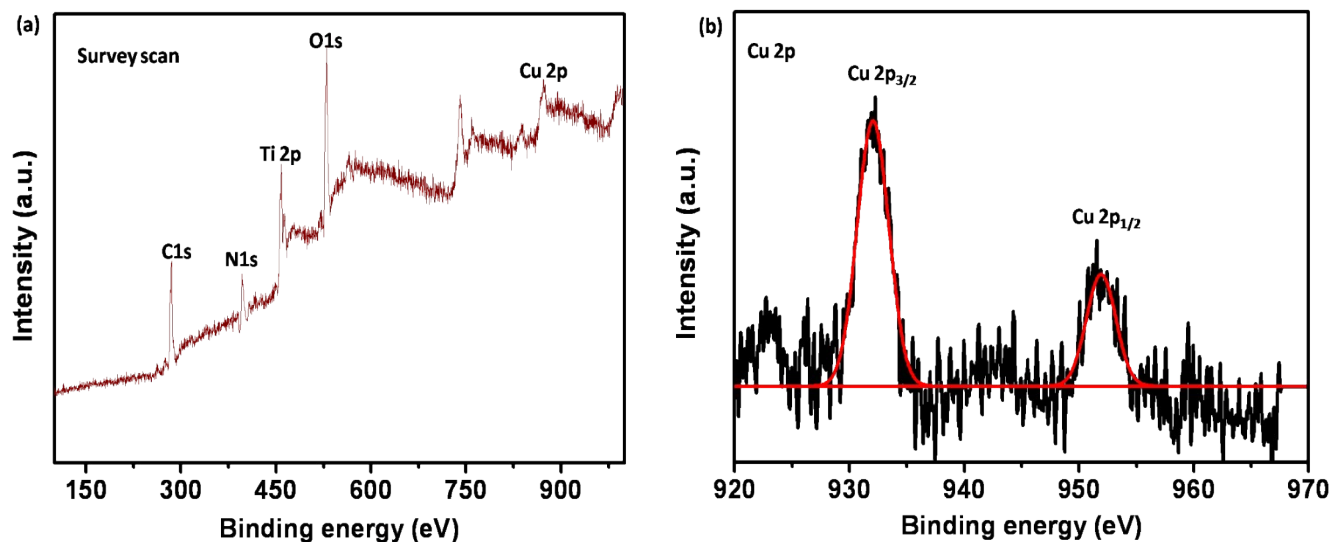

**Figure S6.** Survey scan and Cu2p spectra of Cu<sub>2</sub>O/ NH<sub>2</sub>-MIL-125(Ti) MOFs.

The chemical composition and valence states of Cu element were investigated by XPS spectra. The survey scan spectrum (Fig. S5a) clearly reveals the existence of Ti, Cu, O, N and C in the MOF composite. In addition, it is seen from the Cu2p core level spectrum of Cu, the two predominant binding energies such as 932.5 and 952.4 eV was observed related to Cu 2p<sub>3/2</sub> and Cu 2p<sub>1/2</sub>, respectively and this obviously demonstrates the formation of Cu<sub>2</sub>O.[1] However, the small peak appeared at 945.1 eV due to shake-up of outer electron in the Cu<sup>+</sup> state.[2]

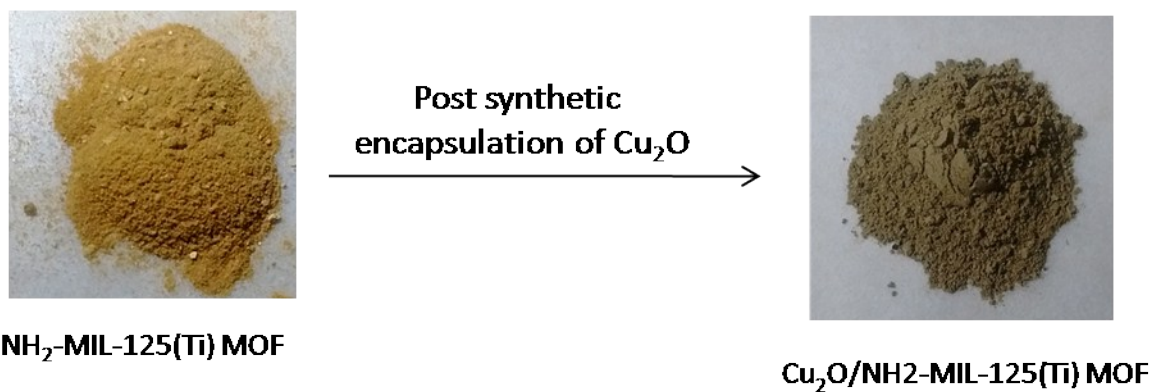

**Figure S7.** The photographs of pristine NH<sub>2</sub>-MIL-125(Ti) MOF and (b) Cu<sub>2</sub>O/NH<sub>2</sub>-MIL-125(Ti) MOF.

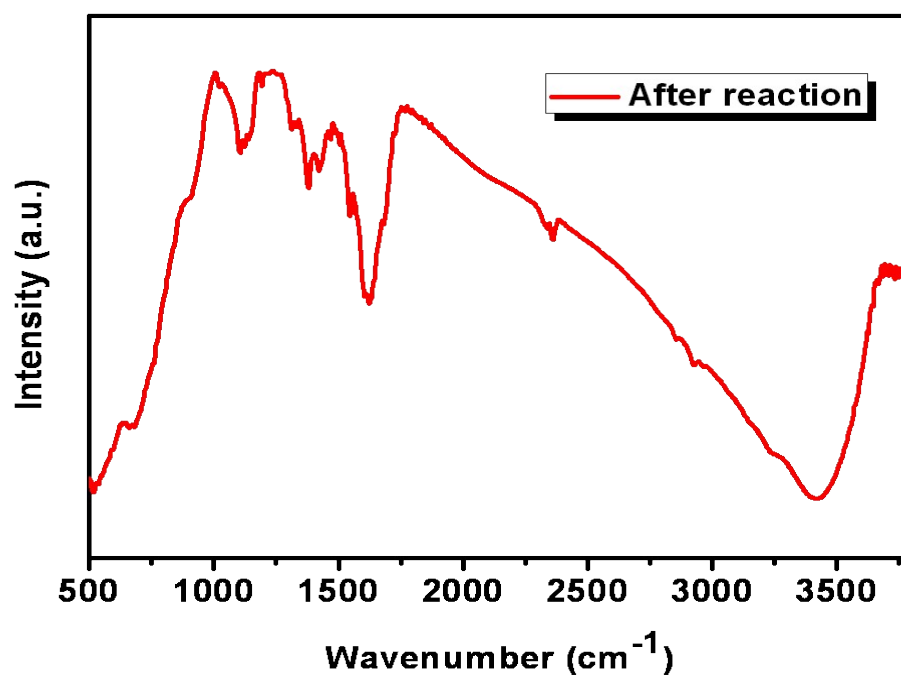

**Figure S8.** FT-IR spectra of after the photocatalytic H<sub>2</sub> production.



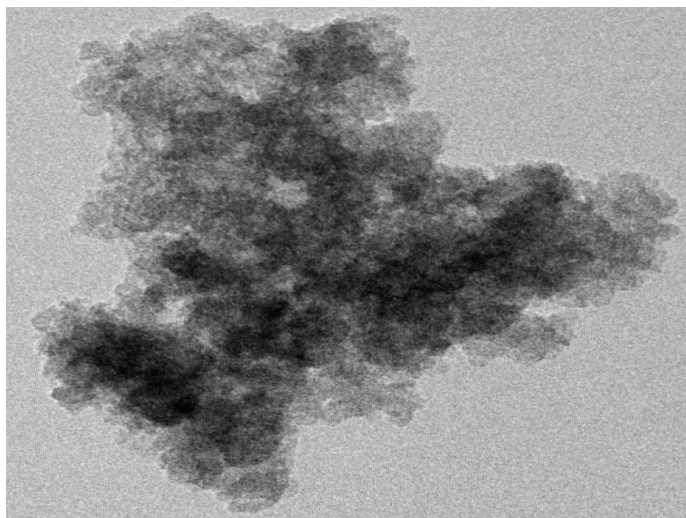

**Figure S9.** TEM image after the photocatalytic H<sub>2</sub> production.

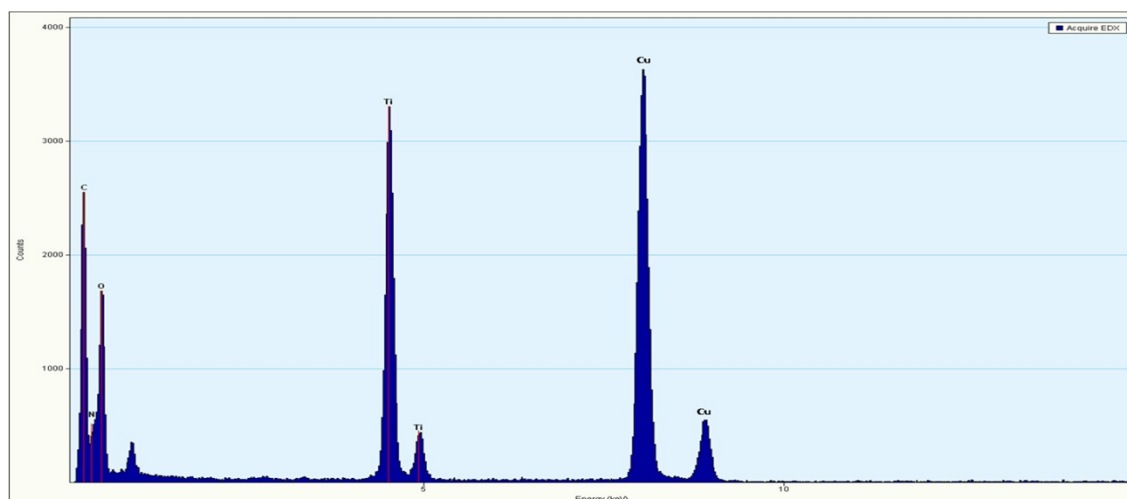

**Figure S10.** TEM-EDX of Cu<sub>2</sub>O/ NH<sub>2</sub>-MIL-125(Ti) MOF after the photocatalytic reaction.

The superior stability of Cu<sub>2</sub>O/ NH<sub>2</sub>-MIL-125(Ti) MOF was further confirmed by the TEM-EDX analysis. It is clearly seen from the Fig. S10 and table S4, there is no significant change in the elemental composition Cu<sub>2</sub>O/ NH<sub>2</sub>-MIL-125(Ti) MOF after the photocatalytic H<sub>2</sub> production.

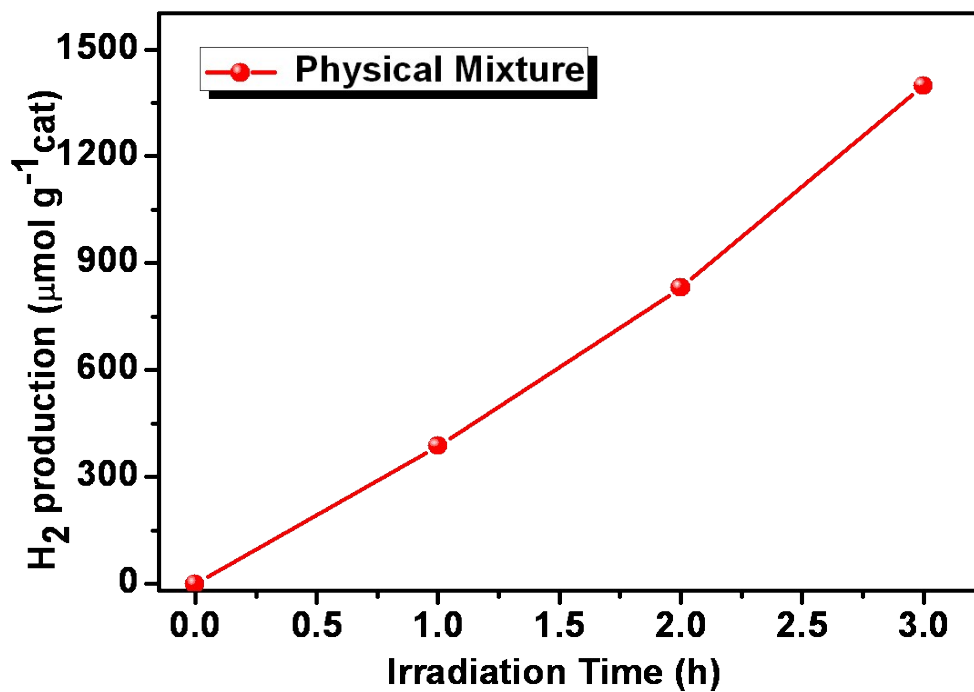

**Figure S11.** Photocatalytic H<sub>2</sub> production using physical mixture of Cu<sub>2</sub>O and NH<sub>2</sub>-MIL-125 (Ti) MOF.

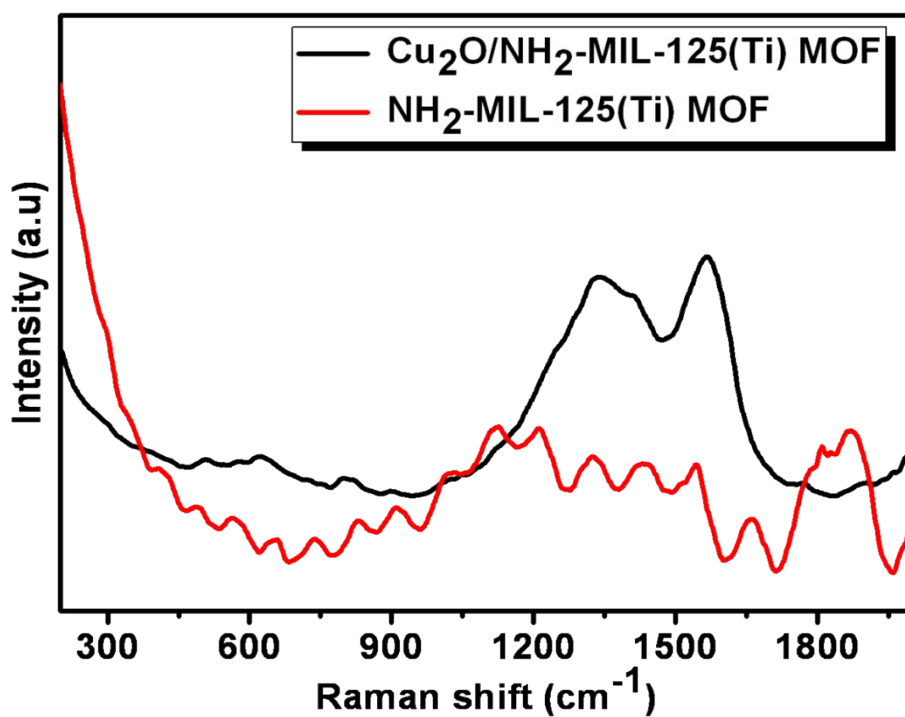

**Figure S12.** Raman analysis of NH<sub>2</sub>-MIL-125(Ti) and Cu<sub>2</sub>O/ NH<sub>2</sub>-MIL-125(Ti) MOFs.

**Table S1.** Elemental composition of Cu<sub>2</sub>O/ NH<sub>2</sub>-MIL-125(Ti) MOF.

| <b>Element</b> | <b>Weight %</b> | <b>Atomic %</b> | <b>Uncert. %</b> | <b>Correction</b> | <b>k-Factor</b> |
|----------------|-----------------|-----------------|------------------|-------------------|-----------------|
| C(K)           | 37.98           | 71.18           | 0.29             | 0.26              | 3.94            |
| N(K)           | 1.25            | 2.02            | 0.07             | 0.26              | 3.826           |
| N(K)           | 1.25            | 2.02            | 0.07             | 0.26              | 3.826           |
| Ti(K)          | 4.3             | 2.02            | 0.05             | 0.98              | 1.229           |
| Cu(K)          | 51.92           | 18.39           | 0.21             | 0.99              | 1.667           |

**Table S2.** The BET surface area and pore volume data of pristine NH<sub>2</sub>-MIL-125(Ti) and Cu<sub>2</sub>O/ NH<sub>2</sub>-MIL-125(Ti) MOF.

| <b>Entry</b>                                       | <b>BET surface area (m<sup>2</sup>/g)</b> | <b>pore volume (nm)</b> |
|----------------------------------------------------|-------------------------------------------|-------------------------|
| NH <sub>2</sub> -MIL-125(Ti)                       | 710                                       | 0.649                   |
| Cu <sub>2</sub> O/NH <sub>2</sub> -MIL-125(Ti) MOF | 689                                       | 0.421                   |

**Table S3.** Photocatalytic H<sub>2</sub> production comparison with existing MOF based catalysts.

| MOF catalyst                                                                                                                           | Co-catalyst  | Reaction conditions                                                               | H <sub>2</sub> evaluation rate             | Quantum efficiency  | Ref. |
|----------------------------------------------------------------------------------------------------------------------------------------|--------------|-----------------------------------------------------------------------------------|--------------------------------------------|---------------------|------|
| MOF-253-Pt                                                                                                                             | Pt           | Light source : 300W Xe<br>Lamp -Visible<br>Sacrificial agent : TEOA               | 3000 μmol                                  | 1.63% at<br>440 nm  | [3]  |
| H <sub>2</sub> TCPP[Al(OH) <sub>2</sub> ](DM F <sub>3</sub> -(H <sub>2</sub> O) <sub>2</sub> )                                         | Colloidal Pt | Light source : 300W Xe<br>Lamp -Visible<br>Sacrificial agent : EDTA               | 200 μmol g <sup>-1</sup> h <sup>-1</sup>   | 0.1 %               | [4]  |
| {[Ln <sub>2</sub> Cu <sub>5</sub> (OH) <sub>2</sub> (pydc) <sub>6</sub> (H <sub>2</sub> O) <sub>8</sub> ]·I8} (Ln: Tb)                 | -            | Light source : 500W Hg<br>Lamp –UV<br>Sacrificial agent : aq. CH <sub>3</sub> OH  | 2105 μmol g <sup>-1</sup> h <sup>-1</sup>  | -----               | [5]  |
| RhB/UiO-66(Zr)-100*                                                                                                                    | Rh-B and Pt  | Light source : 300W Xe<br>Lamp –Visible<br>Sacrificial agent : TEOA               | 116.0 μmol g <sup>-1</sup> h <sup>-1</sup> | -----               | [6]  |
| Pt-UiO-66-30                                                                                                                           | Pt           | Light source : 300W Xe<br>Lamp -Visible<br>Sacrificial agent : CH <sub>3</sub> OH | 4.6 μmol                                   | ~0.25% at<br>420 nm | [7]  |
| Pt/Ti-MOF-Ru(tpy) <sub>2</sub>                                                                                                         | Pt           | Light source : 500W Xe<br>Lamp -Visible<br>Sacrificial agent : TEOA               | 5.1 μmol                                   | -----               | [8]  |
| Pt<br>/[Cu(en) <sub>2</sub> ] <sub>4</sub> [PNb <sub>12</sub> O <sub>40</sub> (VO) <sub>6</sub> ]·(OH) <sub>5</sub> ·8H <sub>2</sub> O | Pt           | Light source : 125W Hg<br>Sacrificial agent :<br>aq.CH <sub>3</sub> OH            | 44.35 μmol g <sup>-1</sup> h <sup>-1</sup> | -----               | [9]  |
| Pt@CdS/MIL-101(Cr)                                                                                                                     | Pt           | Light source : 300W Xe<br>Sacrificial agent : lactic acid                         | 150 μmol g <sup>-1</sup> h <sup>-1</sup>   | -----               | [10] |
| Co@NH <sub>2</sub> -MIL-125(Ti)                                                                                                        | Co           | Light source : 500W Xe/Hg<br>Sacrificial agent : TEOA                             | 37 μmol                                    | 0.5 % at<br>400 nm  | [11] |
| Pt/NH <sub>2</sub> -MIL-125(Ti)                                                                                                        | Pt           | Light source : Xe lamp<br>Sacrificial agent : TEOA                                | 33 μmol                                    | -----               | [12] |
| Pt/MIL-125(Ti)                                                                                                                         | Pt           | Light source : Xe lamp                                                            | 38.68 μmol                                 | -----               | [13] |

|                                                                                    |                        |                                                                                    |                                                               |                            |                      |
|------------------------------------------------------------------------------------|------------------------|------------------------------------------------------------------------------------|---------------------------------------------------------------|----------------------------|----------------------|
|                                                                                    |                        | ( $\lambda=320-780$ nm)<br>Sacrificial agent : TEOA                                |                                                               |                            |                      |
| {[CuI/CuII<br>2-<br>(DCTP) <sub>2</sub> ]NO <sub>3</sub> ·1.5DM<br>F} <sub>n</sub> | Pt                     | Light source : 200 W Xe<br>Sacrificial agent : CH <sub>3</sub> OH                  | 160 $\mu\text{mol h}^{-1}$                                    | 2.3% at 420<br>nm          | [14]                 |
| [CoII(TPA)Cl][Cl]-<br>MIL-125-NH <sub>2</sub>                                      | Co                     | Light source : 200 W Xe<br>Sacrificial agent : CH <sub>3</sub> CN<br>and TEOA      | 553 $\mu\text{mol g}^{-1}\text{h}^{-1}$                       | -----                      | [15]                 |
| Pt@UiO-66-NH <sub>2</sub>                                                          | Pt                     | Light source : 200 W Xe<br>lamp Sacrificial agent :<br>CH <sub>3</sub> CN and TEOA | 257.3 $\mu\text{mol g}^{-1} \text{h}^{-1}$                    | -----                      | [16]                 |
| <b>Cu<sub>2</sub>O/ NH<sub>2</sub>-MIL-<br/>125(Ti) MOF</b>                        | <b>Cu<sub>2</sub>O</b> | <b>Light source : Solar light<br/>Sacrificial agent : 5<br/>%TEOA</b>              | <b>11055.5 <math>\mu\text{mol h}^{-1}\text{g}^{-1}</math></b> | <b>1.4 % at<br/>420 nm</b> | <b>This<br/>work</b> |

**Table S4.** Elemental composition of Cu<sub>2</sub>O/ NH<sub>2</sub>-MIL-125(Ti) MOF after the photocatalytic reaction.

| Element | Weight % | Atomic % | Uncert. % | Correction | k-Factor |
|---------|----------|----------|-----------|------------|----------|
| C(K)    | 35.37    | 48       | 0.34      | 0.26       | 3.94     |
| N(K)    | 2.19     | 2.55     | 0.11      | 0.26       | 3.826    |
| O(K)    | 43.79    | 44.61    | 0.29      | 0.49       | 1.974    |
| Ti(K)   | 0.64     | 0.21     | 0.02      | 0.98       | 1.229    |
| Cu(K)   | 17.98    | 4.61     | 0.16      | 0.99       | 1.667    |

### Apparent Quantum Yield (AQY).

The AQY of photocatalytic H<sub>2</sub> production activity was calculated by using 420 nm band pass filter. The irradiation area was calculated as 0.00144 m<sup>2</sup>

### AQY Calculation details:

The energy of one photon ( $E_{\text{photon}}$ ) with wavelength of  $\lambda_{\text{inc}}$  (nm) is calculated using the following equation.

$$E_{\text{photon}} = \frac{hc}{\lambda_{\text{inc}}}$$

Here,

h - Planck's constant (J·s)

c - Speed of light (m s<sup>-1</sup>)

$\lambda_{\text{inc}}$ - wavelength of the incident monochromatic light (m)

Total energy of the incident light ( $E_{\text{total}}$ ) is can be calculated by following equation:

$$E_{\text{total}} = PSt$$

Where,

P - Power density of the incident monochromatic light (W·m<sup>-2</sup>)

S - Irradiation area (m<sup>2</sup>)

t- Duration of the incident light exposure (s)

The number of incident photons can be obtained through the following equation

$$\text{Number of incident photons} = \frac{E_{\text{total}}}{E_{\text{photon}}hc} = \frac{PS \lambda_{\text{inct}}}{hc}$$

Quantum yield (Q.Y.) which is widely used to evaluate the performance of photocatalysts for water splitting, is defined by the following equation

$$\text{Q.Y.(\%)} = \frac{\text{Q.Y.(\%)} \text{ Number of reacted electrons}}{\text{Number of incident photons}} \times 100$$

Or

$$\text{A.Q.Y.(\%)} = \frac{2 \text{ (Number of H}_2 \text{ molecules evolved)}}{\text{Number of incident photons}} \times 100$$

## References

1. J. Chastain, R. C. King and J. Moulder, *Handbook of X-ray photoelectron spectroscopy: a reference book of standard spectra for identification and interpretation of XPS data*, Physical Electronics Division, Perkin-Elmer Corporation Eden Prairie, Minnesota, 1992.
2. X. Y. Dong, M. Zhang, R. B. Pei, Q. Wang, D. H. Wei, S. Q. Zang, Y. T. Fan and T. C. Mak, *Angew. Chem., Int. Ed.* 2016, **55**, 2073-2077.
3. T. Zhou, Y. Du, A. Borgna, J. Hong, Y. Wang, J. Han, W. Zhang and R. Xu, *Energy Environ. Sci.*, 2013, **6**, 3229-3234.
4. A. Fateeva, P. A. Chater, C. P. Ireland, A. A. Tahir, Y. Z. Khimyak, P. V. Wiper, J. R. Darwent and M. J. Rosseinsky, *Angew. Chem. Int. Ed.*, 2012, **124**, 7558-7562.
5. X.-L. Hu, C.-Y. Sun, C. Qin, X.-L. Wang, H.-N. Wang, E.-L. Zhou, W.-E. Li and Z.-M. Su, *Chem. Commun.*, 2013, **49**, 3564-3566.

6. J. He, J. Wang, Y. Chen, J. Zhang, D. Duan, Y. Wang and Z. Yan, *Chem. Commun.*, 2014, **50**, 7063-7066.
7. Y.-P. Yuan, L.-S. Yin, S.-W. Cao, G.-S. Xu, C.-H. Li and C. Xue, *Appl. Catal. B. Environ.*, 2015, **168**, 572-576.
8. T. Toyao, M. Saito, S. Dohshi, K. Mochizuki, M. Iwata, H. Higashimura, Y. Horiuchi and M. Matsuoka, *Chem. Commun.*, 2014, **50**, 6779-6781.
9. J.-Q. Shen, Y. Zhang, Z.-M. Zhang, Y.-G. Li, Y.-Q. Gao and E.-B. Wang, *Chem. Commun.*, 2014, **50**, 6017-6019.
10. J. He, Z. Yan, J. Wang, J. Xie, L. Jiang, Y. Shi, F. Yuan, F. Yu and Y. Sun, *Chem. Commun.*, 2013, **49**, 6761-6763.
11. M. A. Nasalevich, R. Becker, E. V. Ramos-Fernandez, S. Castellanos, S. L. Veber, M. V. Fedin, F. Kapteijn, J. N. Reek, J. Van Der Vlugt and J. Gascon, *Energy Environ. Sci.*, 2015, **8**, 364-375.
12. Y. Horiuchi, T. Toyao, M. Saito, K. Mochizuki, M. Iwata, H. Higashimura, M. Anpo and M. Matsuoka, *J. Phys. Chem. C*, 2012, **116**, 20848-20853.
13. L. Shen, M. Luo, L. Huang, P. Feng and L. Wu, *Inorg. Chem.* 2015, **54**, 1191-1193.
14. Z. L. Wu, C. H. Wang, B. Zhao, J. Dong, F. Lu, W. H. Wang, W. C. Wang, G. J. Wu, J. Z. Cui and P. Cheng, *Angew. Chem. Int. Ed.*, 2016, **55**, 4938-4942.
15. Z. Li, J.-D. Xiao and H.-L. Jiang, *ACS Catal.*, 2016, **6**, 5359-5365.
16. J. D. Xiao, Q. Shang, Y. Xiong, Q. Zhang, Y. Luo, S. H. Yu and H. L. Jiang, *Angew. Chem. Int. Ed.*, 2016, **55**, 9389-9393.
